# Supplementary material for: Mutational profiling of brain metastasis from breast cancer: matched pair analysis of targeted sequencing between brain metastasis and primary breast cancer
Source: PubMed Central journal article supplement (PMC4791262; doi:10.18632/oncotarget.6192), 2015-10-20
Supplement: oncotarget-06-43731-s001.pdf [file oncotarget-06-43731-s001.pdf]

## Mutational profiling of brain metastasis from breast cancer: matched pair analysis of targeted sequencing between brain metastasis and primary breast cancer

### Supplementary Materials

Supplementary Table 3: Frequency of mutation according to the subtype of breast cancer

|           |        |      | Variant calls<br>( <i>N</i> = 25) |      | Mutation<br>( <i>N</i> = 23) |      |
|-----------|--------|------|-----------------------------------|------|------------------------------|------|
|           |        |      | <i>N</i>                          | %    | <i>N</i>                     | %    |
|           |        |      | Breast                            | IHC  | ER+                          | 8    |
| ER+/HER2+ | 0      | 0    |                                   |      | 0                            | 0    |
| HER2+     | 5      | 20.0 |                                   |      | 5                            | 21.7 |
| TN        | 12     | 48.0 |                                   |      | 10                           | 43.5 |
| PAM50     | LumA   | 9    |                                   | 36.0 | 9                            | 39.1 |
|           | LumB   | 0    |                                   | 0    | 0                            | 0    |
|           | HER2   | 9    |                                   | 36.0 | 8                            | 34.8 |
|           | Basal  | 7    |                                   | 28.0 | 6                            | 26.1 |
|           | Normal | 0    |                                   | 0    | 0                            | 0    |

  

|           |        |      | Variant calls<br>( <i>N</i> = 72) |      | Mutation<br>( <i>N</i> = 64) |      |
|-----------|--------|------|-----------------------------------|------|------------------------------|------|
|           |        |      | <i>N</i>                          | %    | <i>N</i>                     | %    |
|           |        |      | Brain                             | IHC  | ER+                          | 24   |
| ER+/HER2+ | 7      | 9.7  |                                   |      | 7                            | 10.9 |
| HER2+     | 12     | 16.7 |                                   |      | 11                           | 17.2 |
| TN        | 29     | 40.3 |                                   |      | 25                           | 39.1 |
| PAM50     | LumA   | 13   |                                   | 18.1 | 10                           | 15.6 |
|           | LumB   | 17   |                                   | 23.6 | 17                           | 26.6 |
|           | HER2   | 19   |                                   | 26.4 | 16                           | 25.0 |
|           | Basal  | 22   |                                   | 30.5 | 20                           | 31.3 |
|           | Normal | 1    |                                   | 1.4  | 1                            | 1.5  |

**Supplementary Table 4: TP53 mutations in brain metastasis**

| Case No. | IHC           | PAM50  | Exon | Coding              | Function                | Protein     |
|----------|---------------|--------|------|---------------------|-------------------------|-------------|
| BB_025   | ER+           | Her2   | 7    | c.497C > G          | [nonsense]              | p.Ser166*   |
| BB_027   | TN            | Her2   | 2    | c.1013_1014insCGAGA | [frameshiftInsertion]   | p.Met340Thr |
| BB_028   | TN            | Basal  | 6    | c.584T > C          | [missense]              | p.Ile195Thr |
| BB_030   | TN            | Basal  | 8    | c.838A > G          | [missense]              | p.Arg280Gly |
| BB_032   | HER2+         | Normal | 5    | c.770T > G          | [missense]              | p.Leu257Arg |
| BB_033   | TN            | Basal  | 7    | c.535C > T          | [missense]              | p.His179Tyr |
| BB_034   | TN            | Basal  | 5    | chr17:7577610T > C  | [splicing]              |             |
| BB_035   | ER+/<br>HER2+ | Her2   | 7    | chr17:7578555C > A  | [splicing]              |             |
| BB_036   | TN            | Basal  | 7    | c.536A > G          | [missense]              | p.His179Arg |
| BB_038   | TN            | Basal  | 2    | c.1024_1024delC     | [frameshiftDeletion]    | p.Arg342Glu |
| BB_043   | TN            | Her2   | 5    | c.740_745delACCGGA  | [nonframeshiftDeletion] | p.Asn247Arg |
|          |               |        | 5    | c.737T > A          | [missense]              | p.Met246Lys |
| BB_046   | ER+           | LumA   | 6    | c.596G > A          | [missense]              | p.Gly199Glu |
| BB_047   | TN            | Basal  | 6    | c.637C > T          | [nonsense]              | p.Arg213*   |
| BB_048   | TN            | Basal  | 8    | c.321C > G          | [nonsense]              | p.Tyr107*   |
| BB_049   | HER2+         | Her2   | 6    | c.584T > A          | [missense]              | p.Ile195Asn |
| BB_050   | HER2+         | Her2   | 7    | c.392A > T          | [missense]              | p.Asn131Ile |
| BB_051   | ER+           | Basal  | 6    | c.585_586insC       | [frameshiftInsertion]   | p.Arg196Pro |
| BB_052   | HER2+         | Her2   | 8    | c.216_216delC       | [frameshiftDeletion]    | p.Val73Trp  |
| BB_058   | ER+/<br>HER2+ | LumB   | 7    | c.488A > G          | [missense]              | p.Tyr163Cys |
| BB_059   | HER2+         | Her2   | 4    | c.846_846delG       | [frameshiftDeletion]    | p.Arg283Ala |
| BB_060   | TN            | Basal  | 6    | c.637_637delC       | [frameshiftDeletion]    | p.Arg213Asp |
|          |               |        | 6    | c.637C > T          | [nonsense]              | p.Arg213*   |
|          |               |        | 10   | c.31G > C           | [missense]              | p.Glu11Gln  |
| BB_061   | ER+           | LumA   | 5    | c.743G > A          | [missense]              | p.Arg248Gln |
|          |               |        | 10   | c.31G > C           | [missense]              | p.Glu11Gln  |
| BB_062   | HER2+         | Her2   | 6    | c.626_627delGA      | [frameshiftDeletion]    | p.Arg209Lys |
|          |               |        | 6    | c.626_626delG       | [frameshiftDeletion]    | p.Arg209Lys |
| BB_064   | ER+           | LumB   | 5    | c.725G > T          | [missense]              | p.Cys242Phe |
| BB_065   | ER+/<br>HER2+ | LumB   | 7    | c.476C > T          | [missense]              | p.Ala159Val |

**Supplementary Table 5: PAM 50 molecular subtype and immunohistochemistry in 15 paired cases**

| Case No. | Pair No. | Group  | PAM50  | IHC   |
|----------|----------|--------|--------|-------|
| BB_001   | 1        | Breast | LumA   | ER+   |
| BB_021   | 1        | Brain  | LumB   | TN    |
| BB_002   | 2        | Breast | LumA   | ER+   |
| BB_022   | 2        | Brain  | LumA   | ER+   |
| BB_003   | 3        | Breast | Basal  | TN    |
| BB_023   | 3        | Brain  | Basal  | TN    |
| BB_004   | 4        | Breast | Her2   | HER2+ |
| BB_024   | 4        | Brain  | LumA   | HER2+ |
| BB_005   | 5        | Breast | LumA   | ER+   |
| BB_025   | 5        | Brain  | Her2   | ER+   |
| BB_006   | 6        | Breast | Her2   | TN    |
| BB_026   | 6        | Brain  | Her2   | TN    |
| BB_007   | 7        | Breast | LumA   | ER+   |
| BB_027   | 7        | Brain  | Her2   | TN    |
| BB_008   | 8        | Breast | Basal  | TN    |
| BB_028   | 8        | Brain  | Basal  | TN    |
| BB_009   | 9        | Breast | Her2   | HER2+ |
| BB_029   | 9        | Brain  | Her2   | HER2+ |
| BB_010   | 10       | Breast | Basal  | TN    |
| BB_030   | 10       | Brain  | Basal  | TN    |
| BB_011   | 11       | Breast | LumA   | ER+   |
| BB_031   | 11       | Brain  | LumB   | ER+   |
| BB_012   | 12       | Breast | Her2   | HER2+ |
| BB_032   | 12       | Brain  | Normal | HER2+ |
| BB_013   | 13       | Breast | Basal  | TN    |
| BB_033   | 13       | Brain  | Basal  | TN    |
| BB_014   | 14       | Breast | Basal  | TN    |
| BB_034   | 14       | Brain  | Basal  | TN    |
| BB_018   | 18       | Breast | Normal | TN    |
| BB_038   | 18       | Brain  | Basal  | TN    |
